# Supplementary material for: Conversion of Mixed Waste Food Substrates by Carotenogenic Yeasts of Rhodotorula sp. Genus
Source: MDPI journal article supplement (doi:10.3390/microorganisms11041013), 2023-04-13

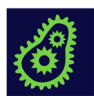

---

*Supplementary material*

# **Conversion of Mixed Waste Food Substrates by Carotenogenic Yeasts of *Rhodotorula* sp. Genus**

**Martin Szotkowski \*, Žaneta Plhalová, Pavlína Sniegoňová, Jiří Holub, Oleg Chujanov, Dominika Špačková, Jana Blažková and Ivana Márová**

Faculty of Chemistry, Brno University of Technology, 612 00 Brno, Czech Republic

\* Correspondence: xcszotkowski@vut.cz; Tel.: +420-775-288-439

## Contents:

|                    |                                                                                                                                                                                                        |
|--------------------|--------------------------------------------------------------------------------------------------------------------------------------------------------------------------------------------------------|
| <b>Figure S1.</b>  | Phase I: Biomass, lipid and $\beta$ -glucan production of <i>Rhodotorula mucilaginosa</i> cultivated on combination of waste lipids and glycerol.                                                      |
| <b>Figure S2.</b>  | Phase I: Fatty acid production of <i>Rhodotorula mucilaginosa</i> cultivated on combination of waste lipids and glycerol                                                                               |
| <b>Figure S3.</b>  | Phase I: Biomass, lipid and $\beta$ -glucan production of <i>Sporidiobolus pararoseus</i> cultivated on combination of waste lipids and glycerol.                                                      |
| <b>Figure S4.</b>  | Phase I: Fatty acid production of <i>Sporidiobolus pararoseus</i> cultivated on combination of waste lipids and glycerol                                                                               |
| <b>Figure S5.</b>  | Phase II: Biomass, lipid and $\beta$ -glucan production of <i>Rhodotorula mucilaginosa</i> cultivated on waste lipid media with and without lipase induction.                                          |
| <b>Figure S6.</b>  | Phase II: Fatty acid production of <i>Rhodotorula mucilaginosa</i> cultivated on waste lipid media with and without lipase induction                                                                   |
| <b>Figure S7.</b>  | Phase II: Biomass, lipid and $\beta$ -glucan production of <i>Sporidiobolus pararoseus</i> cultivated on waste lipid media with and without lipase induction.                                          |
| <b>Figure S8.</b>  | Phase II: Fatty acid production of <i>Sporidiobolus pararoseus</i> cultivated on waste lipid media with and without lipase induction                                                                   |
| <b>Figure S9</b>   | Statistical analysis results of <i>Rhodotorula kratochvilovae</i> cultivated in Erlenmeyer flasks on media with different content of waste carbon lipid source.                                        |
| <b>Figure S10.</b> | Statistical analysis results of <i>Rhodotorula toruloides</i> cultivated in Erlenmeyer flasks on media with different content of waste carbon lipid source.                                            |
| <b>Figure S11.</b> | Statistical analysis results of <i>Rhodotorula mucilaginosa</i> cultivated in Erlenmeyer flasks on media with different content of waste carbon lipid source.                                          |
| <b>Figure S12.</b> | Statistical analysis results of <i>Sporidiobolus pararoseus</i> cultivated in Erlenmeyer flasks on media with different content of waste carbon lipid source.                                          |
| <b>Table S1.</b>   | Phenolic content analysis: gradient elution used during HPLC/DAD analysis                                                                                                                              |
| <b>Table S2.</b>   | HPLC/DAD analysis of yeast, microalgae lipid metabolites: changes in mobile phase composition during gradient elution                                                                                  |
| <b>Table S3.</b>   | Temperature programme of GC/FID analysis of FAMES                                                                                                                                                      |
| <b>Table S4.</b>   | Phase I: Biomass, lipid production, fatty acid profile and $\beta$ -glucan production of <i>Rhodotorula kratochvilovae</i> cultivated on combination of waste lipids and glycerol.                     |
| <b>Table S5.</b>   | Phase I: Biomass, lipid production, fatty acid profile and $\beta$ -glucan production of <i>Rhodotorula toruloides</i> cultivated on combination of waste lipids and glycerol.                         |
| <b>Table S6.</b>   | Phase I: Biomass, lipid production, fatty acid profile and $\beta$ -glucan production of <i>Rhodotorula mucilaginosa</i> cultivated on combination of waste lipids and glycerol.                       |
| <b>Table S7.</b>   | HPLC analysis of Phase I screening cultivations of <i>Rhodotorula mucilaginosa</i> cultivated on combination of waste lipids and glycerol. Productions are listed in mg/g of cell dry weight.          |
| <b>Table S8.</b>   | Phase I: Biomass, lipid production, fatty acid profile and $\beta$ -glucan production of <i>Sporidiobolus pararoseus</i> cultivated on combination of waste lipids and glycerol.                       |
| <b>Table S9.</b>   | HPLC analysis of Phase I screening cultivations of <i>Sporidiobolus pararoseus</i> cultivated on combination of waste lipids and glycerol. Productions are listed in mg/g of cell dry weight           |
| <b>Table S10.</b>  | Phase II: Biomass, lipid production, fatty acid profile and $\beta$ -glucan production of <i>Rhodotorula kratochvilovae</i> cultivated on on waste lipid media with and without lipase induction.      |
| <b>Table S11.</b>  | Phase II: Biomass, lipid production, fatty acid profile and $\beta$ -glucan production of <i>Rhodotorula toruloides</i> cultivated on on waste lipid media with and without lipase induction.          |
| <b>Table S12.</b>  | Phase II: Biomass, lipid production, fatty acid profile and $\beta$ -glucan production of <i>Rhodotorula mucilaginosa</i> cultivated on on waste lipid media with and without lipase induction.        |
| <b>Table S13.</b>  | HPLC analysis of Phase II screening cultivations <i>Rhodotorula mucilaginosa</i> cultivated on waste lipid media with and without lipase induction. Productions are listed in mg/g of cell dry weight. |
| <b>Table S14.</b>  | Phase II: Biomass, lipid production, fatty acid profile and $\beta$ -glucan production of <i>Sporidiobolus pararoseus</i> cultivated on on waste lipid media with and without lipase induction.        |
| <b>Table S15.</b>  | HPLC analysis of Phase II screening cultivations <i>Sporidiobolus pararoseus</i> cultivated on waste lipid media with and without lipase induction. Productions are listed in mg/g of cell dry weight. |
| <b>Table S16.</b>  | Biomass, lipid production, fatty acid profile and $\beta$ -glucan production of <i>Rhodotorula kratochvilovae</i> in a bioreactor cultivation on coffee oil and glycerol with lipase induction.        |
| <b>Table S17.</b>  | Biomass, lipid production, fatty acid profile and $\beta$ -glucan production of <i>Rhodotorula toruloides</i> in a bioreactor cultivation on coffee oil and glycerol with lipase induction.            |

- Chromatogram S1 GC-FID analysis chromatogram of *Rhodotorula toruloides* cultivated on media with waste frying oil as a carbon source in Erlenmeyer flask.
- Chromatogram S2 GC-FID analysis chromatogram of *Rhodotorula kratochvilovae* cultivated on media with waste coffee oil as a carbon source in Erlenmeyer flask.
- Chromatogram S3 HPLC-DAD analysis chromatogram of *Rhodotorula toruloides* cultivated on control media in Erlenmeyer flask
- Chromatogram S4 HPLC-DAD analysis chromatogram of *Rhodotorula kratochvilovae* bioreactor cultivation at 144<sup>th</sup> hour.

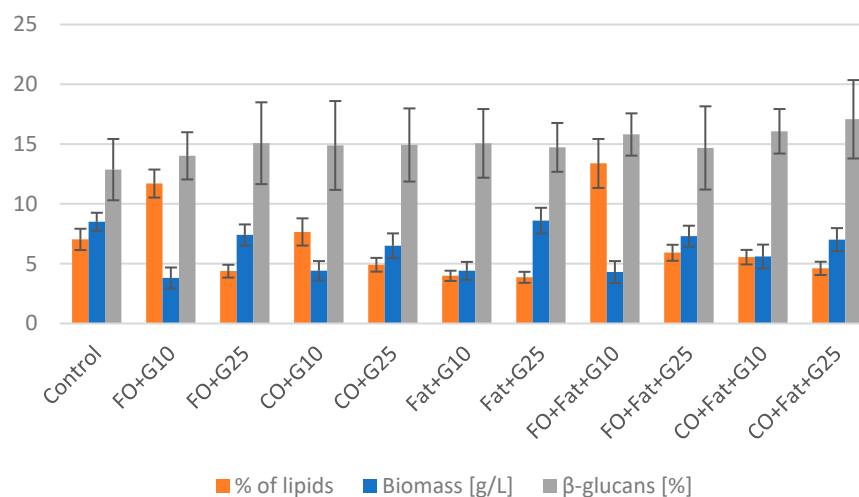

Figure S1. Phase I: Biomass, lipid and β-glucan production of *Rhodotorula mucilaginosa* cultivated on combination of waste lipids and glycerol.

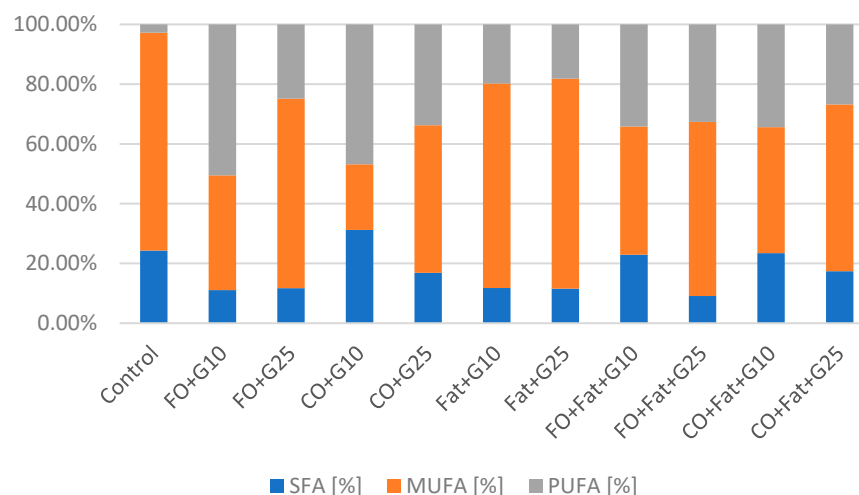

Figure S2. Phase I: Fatty acid production of *Rhodotorula mucilaginosa* cultivated on combination of waste lipids and glycerol

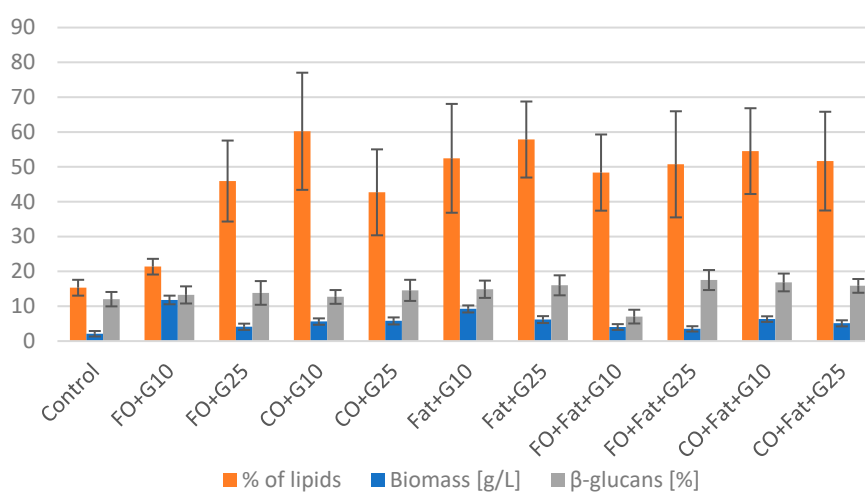

Figure S3. Phase I: Biomass, lipid and  $\beta$ -glucan production of *Sporidiobolus pararoseus* cultivated on combination of waste lipids and glycerol.

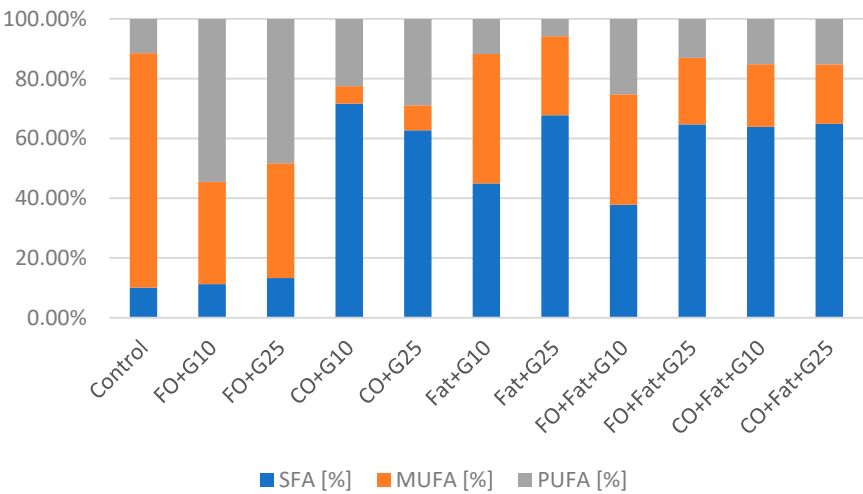

Figure S4. Phase I: Fatty acid production of *Sporidiobolus pararoseus* cultivated on combination of waste lipids and glycerol

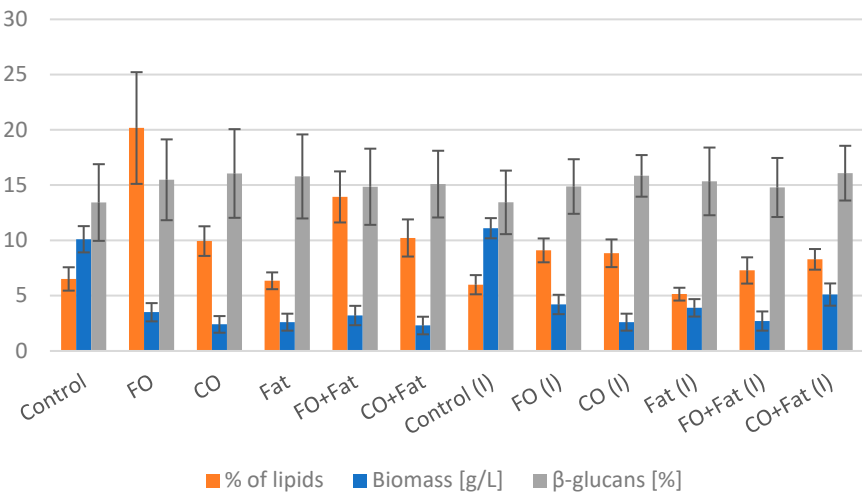

Figure S5. Phase II: Biomass, lipid and  $\beta$ -glucan production of *Rhodotorula mucilaginosa* cultivated on waste lipid media with and without lipase induction.

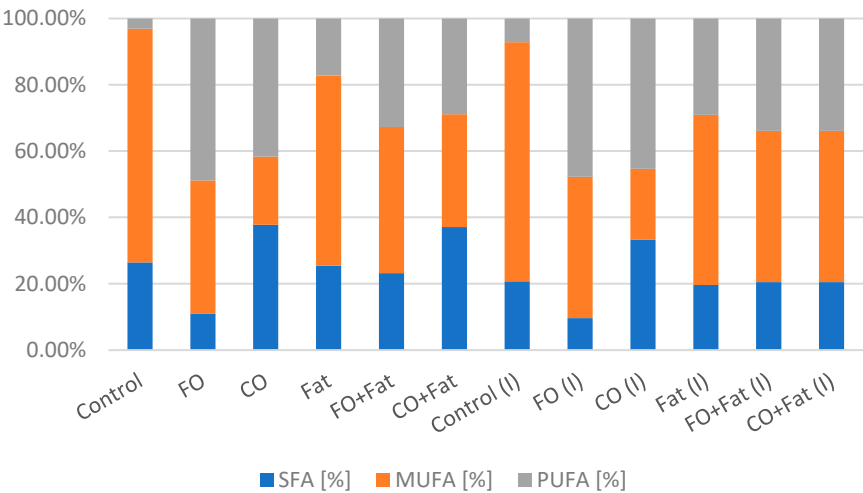

Figure S6. Phase II: Fatty acid production of *Rhodotorula mucilaginosa* cultivated on waste lipid media with and without lipase induction

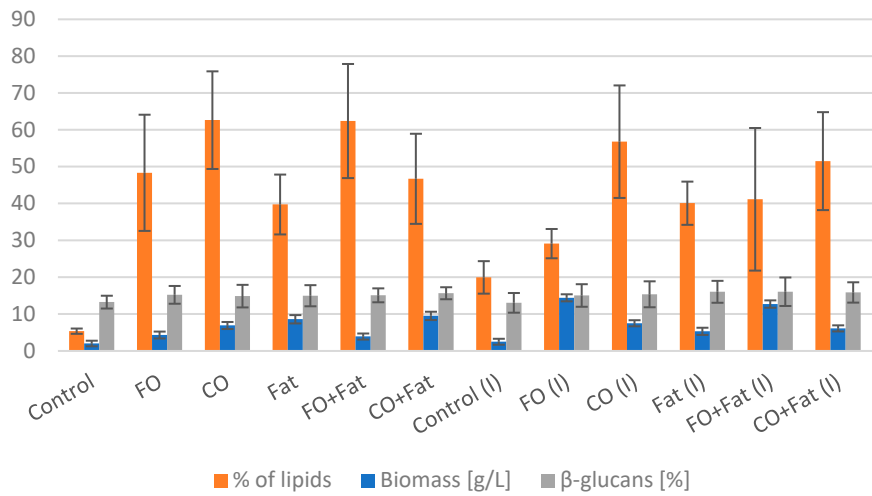

Figure S7. Phase II: Biomass, lipid and β-glucan production of *Sporidiobolus pararoseus* cultivated on waste lipid media with and without lipase induction.

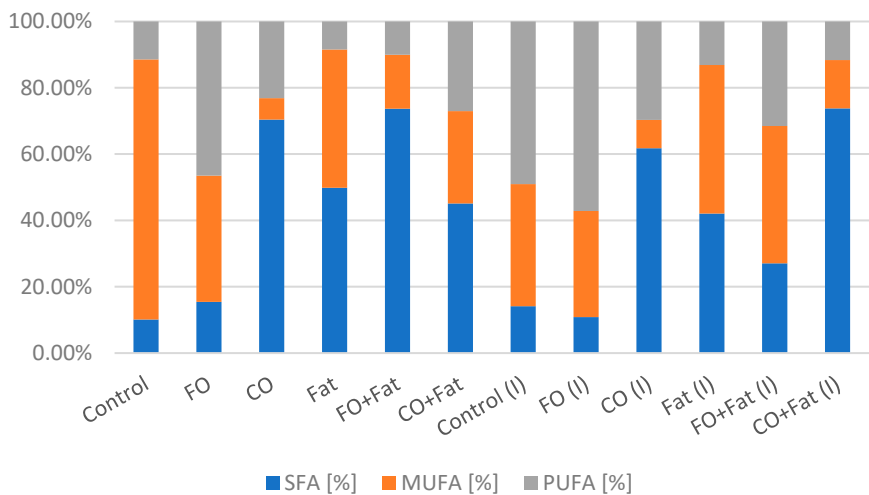

Figure S8. Phase II: Fatty acid production of *Sporidiobolus pararoseus* cultivated on waste lipid media with and without lipase induction

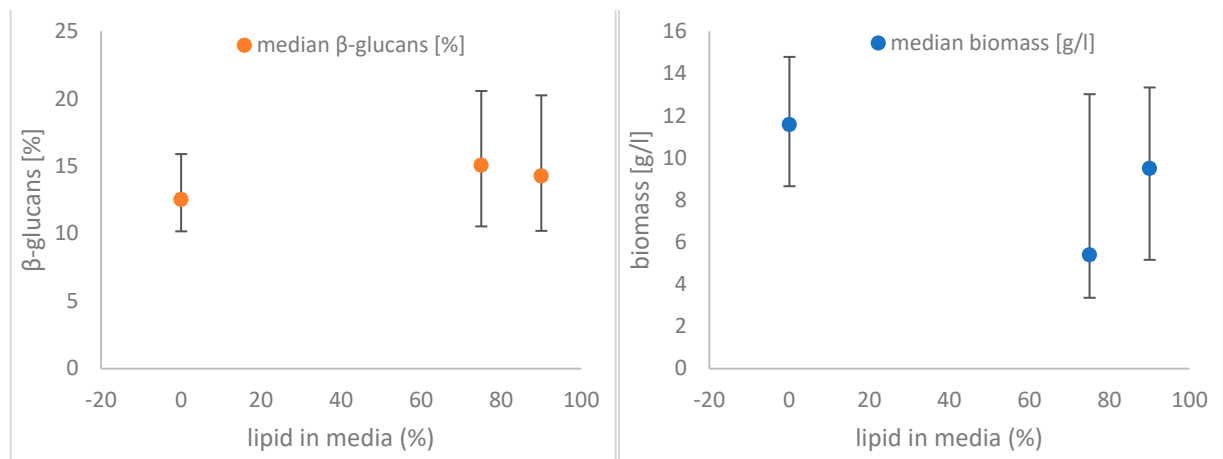

Figure S9. Statistical analysis results of *Rhodotorula kratochvilovae* cultivated in Erlenmeyer flasks on media with different content of waste carbon lipid source.

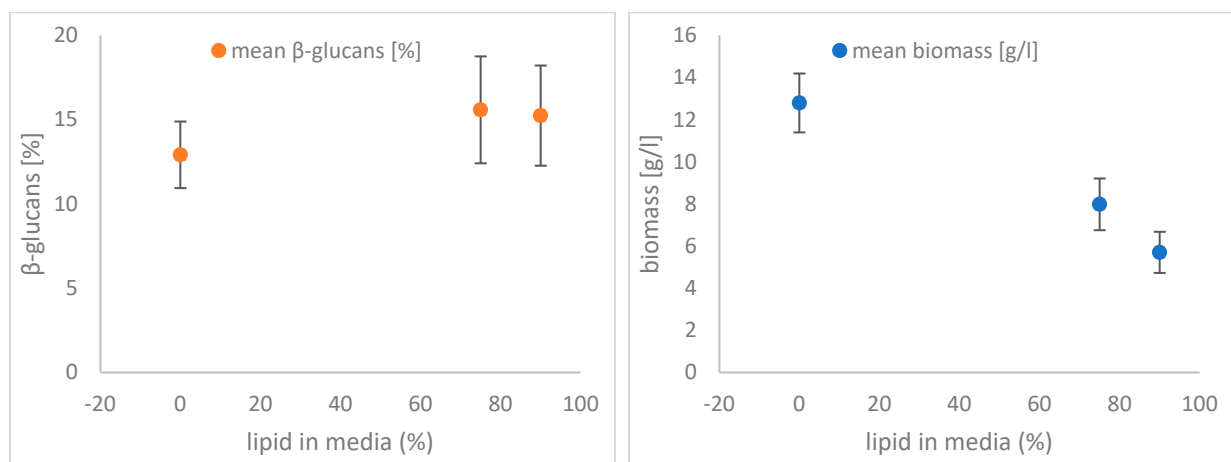

Figure S10. Statistical analysis results of *Rhodotorula toruloides* cultivated in Erlenmeyer flasks on media with different content of waste carbon lipid source.

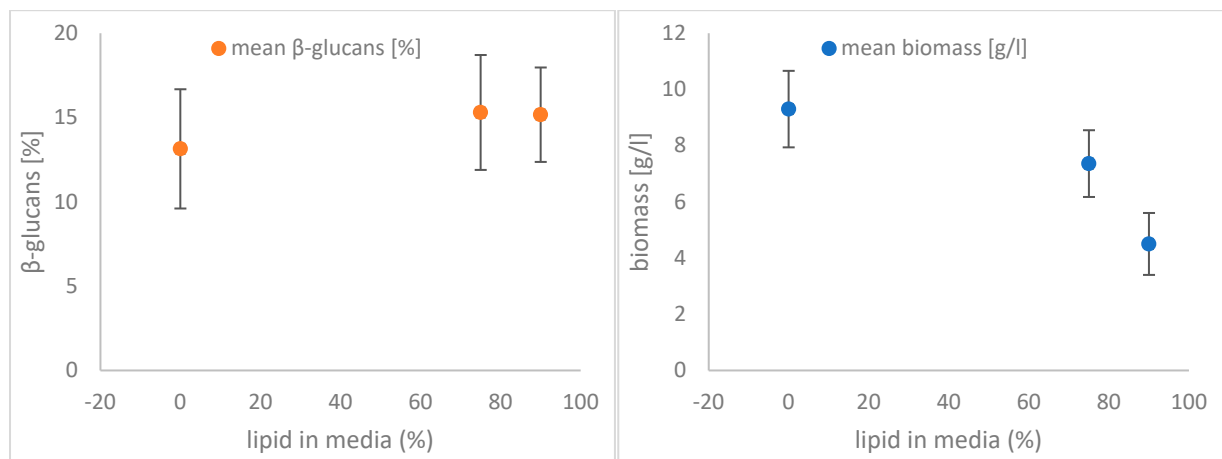

Figure S11. Statistical analysis results of *Rhodotorula mucilaginosa* cultivated in Erlenmeyer flasks on media with different content of waste carbon lipid source.

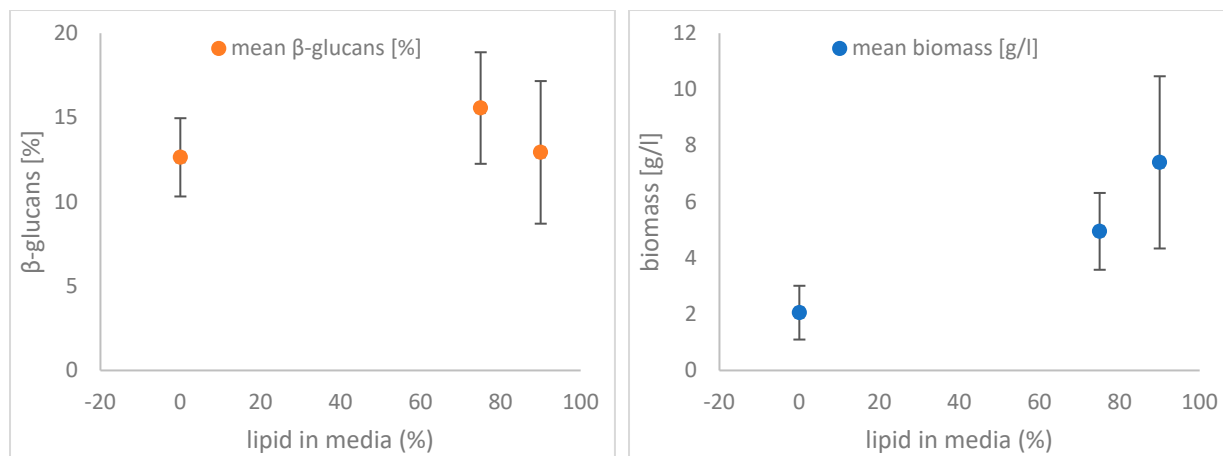

Figure S12. Statistical analysis results of *Sporidiobolus pararoseus* cultivated in Erlenmeyer flasks on media with different content of waste carbon lipid source.

Table S1. Phenolic content analysis: gradient elution used during HPLC/DAD analysis

|   | Retention time [min] | Mobile phase A [%] | Mobile phase B [%] |
|---|----------------------|--------------------|--------------------|
| 1 | 0.0                  | 90 %               | 10 %               |
| 2 | 1.0                  | 90 %               | 10 %               |
| 3 | 5.0                  | 85 %               | 15 %               |
| 4 | 10.0                 | 80 %               | 20 %               |
| 5 | 21.0                 | 25 %               | 75 %               |
| 6 | 26.0                 | 55 %               | 45 %               |
| 7 | 30.0                 | 90 %               | 10 %               |

Table S2. HPLC/DAD analysis of yeast, microalgae lipid metabolites: changes in mobile phase composition during gradient elution

|   | Retention time [min] | Mobile phase A [%] | Mobile phase B [%] |
|---|----------------------|--------------------|--------------------|
| 1 | 0.0                  | 100 %              | 0 %                |
| 2 | 13.0                 | 0 %                | 100 %              |
| 3 | 19.0                 | 0 %                | 100 %              |
| 4 | 20.0                 | 100 %              | 0 %                |
| 5 | 25.0                 | 100 %              | 0 %                |

Table S3. Temperature programme of GC/FID analysis of FAMES

|   | Retention time (min) | gradient (°C·min <sup>-1</sup> ) | temperature (°C) | retention (min) |
|---|----------------------|----------------------------------|------------------|-----------------|
| 1 | 0.000                | start                            | -                | -               |
| 2 | 1.000                | 0.000                            | 80.000           | 1.000           |
| 3 | 5.000                | 15.000                           | 140.000          | 0.000           |
| 4 | 21.667               | 3.000                            | 190.000          | 0.000           |
| 5 | 24.467               | 25.000                           | 260.000          | 1.000           |
| 6 | 24.467               | stop                             | -                | -               |



Table S4. Phase I: Biomass, lipid production, fatty acid profile and  $\beta$ -glucan production of *Rhodotorula kratochvilovae* cultivated on combination of waste lipids and glycerol.

| Sample name | biomass [g/l] | % of lipids | SFA [%] | MUFA [%] | PUFA [%] | $\beta$ -glucans [%] |
|-------------|---------------|-------------|---------|----------|----------|----------------------|
| Control     | 9.50±0.85     | 8.89±1.27   | 33.50%  | 50.36%   | 16.14%   | 13.04±2.87           |
| FO+G10      | 4.90±0.89     | 8.62±1.08   | 10.95%  | 37.78%   | 51.27%   | 15.03±3.64           |
| FO+G25      | 12.5±0.84     | 9.90±1.57   | 15.22%  | 42.66%   | 42.12%   | 15.74±4.03           |
| CO+G10      | 5.30±0.78     | 13.60±2.72  | 29.61%  | 16.60%   | 53.79%   | 14.32±3.78           |
| CO+G25      | 10.10±1.15    | 17.40±3.46  | 34.61%  | 19.80%   | 45.59%   | 13.87±3.66           |
| Fat+G10     | 4.30±0.94     | 10.12±1.69  | 14.68%  | 53.52%   | 31.80%   | 14.65±2.34           |
| Fat+G25     | 6.10±0.94     | 9.35±1.75   | 18.46%  | 50.97%   | 30.56%   | 15.01±2.98           |
| FO+Fat+G10  | 12.00±1.02    | 22.15±6.84  | 13.73%  | 48.95%   | 37.32%   | 14.87±3.48           |
| FO+Fat+G25  | 10.40±0.81    | 12.84±2.62  | 17.82%  | 45.40%   | 36.78%   | 14.06±2.46           |
| CO+Fat+G10  | 4.80±0.75     | 14.48±2.63  | 25.50%  | 38.58%   | 35.91%   | 16.87±3.71           |
| CO+Fat+G25  | 8.50±0.90     | 13.15±1.79  | 23.89%  | 38.64%   | 37.48%   | 16.03±4.23           |

Table S5. Phase I: Biomass, lipid production, fatty acid profile and  $\beta$ -glucan production of *Rhodotorula toruloides* cultivated on combination of waste lipids and glycerol.

| Sample name | biomass [g/l] | % of lipids | SFA [%] | MUFA [%] | PUFA [%] | $\beta$ -glucans [%] |
|-------------|---------------|-------------|---------|----------|----------|----------------------|
| Control     | 13.38±0.97    | 15.10±3.70  | 35.95%  | 60.37%   | 3.68%    | 12.98±1.56           |
| FO+G10      | 6.41±0.81     | 9.70±1.61   | 8.90%   | 64.59%   | 26.51%   | 13.71±2.47           |
| FO+G25      | 8.76±1.09     | 13.17±1.37  | 9.57%   | 66.04%   | 24.39%   | 14.53±3.03           |
| CO+G10      | 5.59±0.87     | 15.90±3.36  | 40.32%  | 16.72%   | 42.97%   | 15.03±2.86           |
| CO+G25      | 6.74±0.93     | 14.56±2.26  | 36.33%  | 22.45%   | 41.21%   | 14.82±3.07           |
| Fat+G10     | 5.40±0.79     | 6.13±0.76   | 11.60%  | 55.88%   | 32.52%   | 14.66±3.06           |
| Fat+G25     | 8.20±0.79     | 8.63±1.10   | 18.53%  | 59.73%   | 21.74%   | 15.62±2.98           |
| FO+Fat+G10  | 5.40±0.98     | 6.89±0.73   | 10.15%  | 52.56%   | 37.29%   | 16.72±1.89           |
| FO+Fat+G25  | 8.20±1.05     | 8.49±1.16   | 14.69%  | 55.33%   | 29.99%   | 15.87±2.48           |
| CO+Fat+G10  | 5.70±0.76     | 18.01±2.19  | 37.55%  | 32.31%   | 30.14%   | 16.08±2.63           |
| CO+Fat+G25  | 8.00±0.87     | 16.24±4.13  | 34.22%  | 36.45%   | 29.32%   | 17.03±2.78           |

Table S6. Phase I: Biomass, lipid production, fatty acid profile and  $\beta$ -glucan production of *Rhodotorula mucilaginosa* cultivated on combination of waste lipids and glycerol.

| Sample name | biomass [g/l] | % of lipids | SFA [%] | MUFA [%] | PUFA [%] | $\beta$ -glucans [%] |
|-------------|---------------|-------------|---------|----------|----------|----------------------|
| Control     | 8.50±0.79     | 7.03±0.80   | 24.30%  | 72.90%   | 2.80%    | 12.87±2.56           |
| FO+G10      | 3.80±0.76     | 11.71±1.32  | 11.05%  | 38.44%   | 50.51%   | 14.02±1.98           |
| FO+G25      | 7.40±0.83     | 4.38±0.57   | 11.71%  | 63.41%   | 24.88%   | 15.08±3.42           |
| CO+G10      | 4.40±0.94     | 7.65±0.92   | 31.21%  | 21.99%   | 46.80%   | 14.89±3.72           |
| CO+G25      | 6.50±0.92     | 4.91±0.69   | 16.85%  | 49.39%   | 33.76%   | 14.93±3.06           |
| Fat+G10     | 4.40±0.92     | 3.99±0.43   | 11.77%  | 68.43%   | 19.80%   | 15.06±2.87           |
| Fat+G25     | 8.60±1.12     | 3.85±0.51   | 11.54%  | 70.29%   | 18.18%   | 14.73±2.04           |
| FO+Fat+G10  | 4.30±0.88     | 13.39±1.62  | 22.90%  | 42.92%   | 34.18%   | 15.81±1.77           |
| FO+Fat+G25  | 7.30±0.75     | 5.91±0.79   | 9.08%   | 58.31%   | 32.62%   | 14.68±3.48           |
| CO+Fat+G10  | 5.60±0.79     | 5.55±0.73   | 23.46%  | 42.12%   | 34.42%   | 16.07±1.86           |
| CO+Fat+G25  | 7.00±0.75     | 4.61±0.63   | 17.39%  | 55.84%   | 26.77%   | 17.08±3.28           |

Table S7. HPLC analysis of Phase I screening cultivations of *Rhodotorula mucilaginosa* cultivated on combination of waste lipids and glycerol. Productions are listed in mg/g of cell dry weight.

| Sample name | Torularhodin | Lycopene    | Total carotenoids | Ubiquinone   | Ergosterol  |
|-------------|--------------|-------------|-------------------|--------------|-------------|
| Control     | 0.363±0.026  | 0.735±0.056 | 1.157±0.084       | 3.526±0.294  | 3.452±0.31  |
| FO+G10      | 0.307±0.022  | 0.216±0.015 | 0.536±0.038       | 9.18±0.851   | 2.802±0.235 |
| FO+G25      | 0.170±0.012  | 0.083±0.006 | 0.254±0.018       | 4.701±0.406  | 3.688±0.376 |
| CO+G10      | 1.488±0.113  | 3.578±0.281 | 5.280±0.611       | 6.661±0.817  | 5.34±0.508  |
| CO+G25      | 0.334±0.024  | 0.682±0.050 | 1.092±0.081       | 5.357±0.583  | 4.11±0.317  |
| Fat+G10     | 1.117±0.079  | 1.936±0.154 | 3.191±0.282       | 5.621±0.396  | 5.049±0.539 |
| Fat+G25     | 1.918±0.161  | 4.369±0.413 | 6.450±0.694       | 5.435±0.511  | 7.587±1.071 |
| FO+Fat+G10  | 0.494±0.035  | 0.15±0.011  | 0.671±0.050       | 4.781±0.366  | 4.769±0.337 |
| FO+Fat+G25  | 0±0          | 0±0         | 0.012±0.001       | 6.478±0.553  | 4.231±0.380 |
| CO+Fat+G10  | 1.747±0.144  | 4.343±0.324 | 6.232±0.679       | 10.201±1.499 | 5.085±0.472 |
| CO+Fat+G25  | 1.523±0.123  | 3.144±0.243 | 4.771±0.366       | 4.991±0.384  | 6.014±0.727 |

Table S8. Phase I: Biomass, lipid production, fatty acid profile and  $\beta$ -glucan production of *Sporidiobolus pararoseus* cultivated on combination of waste lipids and glycerol.

| Sample name | biomass [g/l] | % of lipids | SFA [%] | MUFA [%] | PUFA [%] | $\beta$ -glucans [%] |
|-------------|---------------|-------------|---------|----------|----------|----------------------|
| Control     | 2.10±0.81     | 15.34±3.33  | 10.08%  | 78.46%   | 11.46%   | 12.04±2.08           |
| FO+G10      | 11.81±0.84    | 21.38±4.50  | 11.22%  | 34.24%   | 54.54%   | 13.24±2.46           |
| FO+G25      | 4.12±0.77     | 45.94±11.62 | 13.29%  | 38.41%   | 48.30%   | 13.82±3.41           |
| CO+G10      | 5.61±0.75     | 60.22±16.81 | 71.67%  | 5.80%    | 22.53%   | 12.69±1.97           |
| CO+G25      | 5.81±0.98     | 42.72±12.34 | 62.73%  | 8.34%    | 28.93%   | 14.56±3.02           |
| Fat+G10     | 9.24±0.88     | 52.47±1.62  | 44.90%  | 43.38%   | 11.72%   | 14.87±2.48           |
| Fat+G25     | 6.18±0.80     | 57.88±10.91 | 67.72%  | 26.47%   | 5.82%    | 16.02±2.87           |
| FO+Fat+G10  | 4.03±0.85     | 48.38±10.92 | 37.82%  | 36.91%   | 25.26%   | 7.03±1.99            |
| FO+Fat+G25  | 3.52±0.78     | 50.75±15.22 | 64.71%  | 22.25%   | 13.03%   | 17.53±2.85           |
| CO+Fat+G10  | 6.32±0.95     | 54.53±12.32 | 63.88%  | 20.94%   | 15.18%   | 16.84±2.53           |
| CO+Fat+G25  | 5.11±0.78     | 51.67±14.16 | 64.93%  | 19.87%   | 15.20%   | 15.87±1.98           |

Table S9. HPLC analysis of Phase I screening cultivations of *Sporidiobolus pararoseus* cultivated on combination of waste lipids and glycerol. Productions are listed in mg/g of cell dry weight

| Sample name | Betacarotene | Torularhodin | Torulene    | Total carotenoids | Ubiquinone   | Ergosterol   |
|-------------|--------------|--------------|-------------|-------------------|--------------|--------------|
| Control     | 0.464±0.034  | 2.583±0.243  | 0.203±0.014 | 3.329±0.247       | 6.394±0.841  | 10.946±1.596 |
| FO+G10      | 0.343±0.025  | 0.451±0.033  | 0.178±0.013 | 1.085±0.079       | 9.530±1.246  | 3.703±0.373  |
| FO+G25      | 0.004±0      | 0±0          | 0±0         | 0.003±0.005       | 4.789±0.353  | 2.942±0.270  |
| CO+G10      | 0.099±0.007  | 0.057±0.004  | 0.119±0.008 | 1.136±0.091       | 12.81±1.109  | 4.263±0.426  |
| CO+G25      | 0.106±0.007  | 0.085±0.006  | 0.126±0.009 | 0.370±0.027       | 10.041±0.734 | 3.498±0.346  |
| Fat+G10     | 0.184±0.013  | 0.515±0.037  | 0.144±0.010 | 1.053±0.080       | 12.601±2.064 | 4.701±0.503  |
| Fat+G25     | 0.044±0.003  | 0±0          | 0.107±0.008 | 0.511±0.038       | 4.031±0.349  | 2.016±0.157  |
| FO+Fat+G10  | 0.013±0.001  | 0±0          | 0.103±0.007 | 0.136±0.010       | 4.839±0.559  | 2.239±0.194  |
| FO+Fat+G25  | 0±0          | 0±0          | 0±0         | 0.015±0.001       | 4.994±0.562  | 1.169±0.093  |
| CO+Fat+G10  | 0.131±0.009  | 0.179±0.013  | 0.215±0.015 | 0.694±0.052       | 7.461±0.810  | 3.002±0.223  |
| CO+Fat+G25  | 0.103±0.007  | 0±0          | 0.114±0.008 | 0.302±0.022       | 12.296±2.054 | 5.022±0.497  |

Table S10. Phase II: Biomass, lipid production, fatty acid profile and  $\beta$ -glucan production of *Rhodotorula kratochvilovae* cultivated on on waste lipid media with and without lipase induction.

| Sample name | biomass [g/l]    | % of lipids      | SFA [%] | MUFA [%] | PUFA [%] | $\beta$ -glucans [%] |
|-------------|------------------|------------------|---------|----------|----------|----------------------|
| Control     | 13.80 $\pm$ 0.99 | 8.06 $\pm$ 0.95  | 29.56%  | 46.77%   | 23.67%   | 12.54 $\pm$ 1.87     |
| FO          | 3.80 $\pm$ 0.85  | 31.74 $\pm$ 4.41 | 11.05%  | 37.15%   | 51.80%   | 15.32 $\pm$ 2.46     |
| CO          | 2.41 $\pm$ 0.76  | 5.88 $\pm$ 0.81  | 27.29%  | 18.73%   | 53.98%   | 15.42 $\pm$ 3.06     |
| Fat         | 4.92 $\pm$ 0.83  | 15.81 $\pm$ 2.69 | 23.32%  | 51.16%   | 25.52%   | 14.82 $\pm$ 2.74     |
| FO+Fat      | 14.31 $\pm$ 0.90 | 25.48 $\pm$ 5.78 | 13.05%  | 47.98%   | 38.98%   | 13.87 $\pm$ 2.99     |
| CO+Fat      | 1.10 $\pm$ 0.77  | 8.40 $\pm$ 0.91  | 19.38%  | 38.60%   | 42.02%   | 14.58 $\pm$ 3.05     |
| Control (I) | 12.06 $\pm$ 1.09 | 7.11 $\pm$ 0.74  | 24.62%  | 45.07%   | 30.31%   | 13.02 $\pm$ 1.75     |
| FO (I)      | 6.70 $\pm$ 0.77  | 10.52 $\pm$ 1.51 | 7.82%   | 40.36%   | 51.82%   | 15.11 $\pm$ 2.84     |
| CO (I)      | 3.50 $\pm$ 0.77  | 6.68 $\pm$ 0.79  | 22.86%  | 24.90%   | 52.24%   | 14.93 $\pm$ 3.16     |
| Fat (I)     | 5.80 $\pm$ 0.87  | 16.37 $\pm$ 2.31 | 28.26%  | 46.46%   | 25.28%   | 15.06 $\pm$ 2.97     |
| FO+Fat (I)  | 11.10 $\pm$ 0.9  | 14.50 $\pm$ 3.12 | 10.22%  | 47.10%   | 42.68%   | 16.04 $\pm$ 3.57     |
| CO+Fat (I)  | 4.50 $\pm$ 0.76  | 10.78 $\pm$ 1.72 | 22.81%  | 35.01%   | 42.18%   | 15.75 $\pm$ 0.05     |

Table S11. Phase II: Biomass, lipid production, fatty acid profile and  $\beta$ -glucan production of *Rhodotorula toruloides* cultivated on on waste lipid media with and without lipase induction.

| Sample name | biomass [g/l]    | % of lipids      | SFA [%] | MUFA [%] | PUFA [%] | $\beta$ -glucans [%] |
|-------------|------------------|------------------|---------|----------|----------|----------------------|
| Control     | 12.20 $\pm$ 1.14 | 14.90 $\pm$ 1.86 | 43.81%  | 54.05%   | 2.14%    | 12.84 $\pm$ 1.84     |
| FO          | 2.90 $\pm$ 0.85  | 9.68 $\pm$ 1.29  | 9.03%   | 42.99%   | 47.98%   | 15.32 $\pm$ 3.06     |
| CO          | 1.50 $\pm$ 0.76  | 7.17 $\pm$ 0.95  | 23.77%  | 21.37%   | 54.86%   | 15.64 $\pm$ 2.08     |
| Fat         | 3.11 $\pm$ 0.85  | 6.81 $\pm$ 1.09  | 22.64%  | 53.93%   | 23.43%   | 15.32 $\pm$ 2.64     |
| FO+Fat      | 3.03 $\pm$ 0.85  | 4.79 $\pm$ 0.63  | 12.35%  | 49.23%   | 38.42%   | 13.87 $\pm$ 3.08     |
| CO+Fat      | 3.02 $\pm$ 0.77  | 9.44 $\pm$ 1.10  | 29.79%  | 36.00%   | 34.22%   | 14.08 $\pm$ 2.87     |
| Control (I) | 12.00 $\pm$ 0.78 | 7.81 $\pm$ 1.23  | 33.79%  | 62.64%   | 3.57%    | 13.02 $\pm$ 1.99     |
| FO (I)      | 3.31 $\pm$ 0.90  | 9.71 $\pm$ 1.68  | 6.40%   | 42.72%   | 50.88%   | 15.24 $\pm$ 2.08     |
| CO (I)      | 3.70 $\pm$ 0.87  | 10.04 $\pm$ 1.03 | 31.74%  | 19.79%   | 48.47%   | 16.03 $\pm$ 2.64     |
| Fat (I)     | 4.01 $\pm$ 0.76  | 6.50 $\pm$ 0.92  | 9.55%   | 52.57%   | 37.88%   | 14.87 $\pm$ 3.18     |
| FO+Fat (I)  | 4.22 $\pm$ 0.87  | 5.40 $\pm$ 0.63  | 8.31%   | 54.48%   | 37.21%   | 15.06 $\pm$ 3.72     |
| CO+Fat (I)  | 3.40 $\pm$ 0.81  | 4.83 $\pm$ 0.69  | 12.17%  | 46.33%   | 41.49%   | 16.42 $\pm$ 3.28     |

Table S12. Phase II: Biomass, lipid production, fatty acid profile and  $\beta$ -glucan production of *Rhodotorula mucilaginosa* cultivated on on waste lipid media with and without lipase induction.

| Sample name | biomass [g/l]    | % of lipids      | SFA [%] | MUFA [%] | PUFA [%] | $\beta$ -glucans [%] |
|-------------|------------------|------------------|---------|----------|----------|----------------------|
| Control     | 10.11 $\pm$ 0.94 | 6.51 $\pm$ 1.02  | 26.42%  | 70.45%   | 3.13%    | 13.42 $\pm$ 3.47     |
| FO          | 3.50 $\pm$ 0.85  | 20.17 $\pm$ 5.42 | 10.90%  | 40.25%   | 48.85%   | 15.48 $\pm$ 3.66     |
| CO          | 2.40 $\pm$ 0.79  | 9.93 $\pm$ 1.22  | 37.76%  | 20.57%   | 41.67%   | 16.05 $\pm$ 4.01     |
| Fat         | 2.60 $\pm$ 0.77  | 6.34 $\pm$ 1.04  | 25.47%  | 57.34%   | 17.20%   | 15.78 $\pm$ 3.8      |
| FO+Fat      | 3.21 $\pm$ 0.83  | 13.93 $\pm$ 1.94 | 23.19%  | 44.04%   | 32.77%   | 14.85 $\pm$ 3.45     |
| CO+Fat      | 2.31 $\pm$ 0.81  | 10.21 $\pm$ 1.49 | 37.07%  | 34.04%   | 28.89%   | 15.09 $\pm$ 3.02     |
| Control (I) | 11.10 $\pm$ 1.01 | 5.99 $\pm$ 0.84  | 20.71%  | 72.13%   | 7.17%    | 13.44 $\pm$ 2.87     |

|            |           |           |        |        |        |            |
|------------|-----------|-----------|--------|--------|--------|------------|
| FO (I)     | 4.21±0.87 | 9.10±1.24 | 9.60%  | 42.65% | 47.75% | 14.87±2.47 |
| CO (I)     | 2.60±0.87 | 8.83±0.99 | 33.31% | 21.35% | 45.34% | 15.84±1.88 |
| Fat (I)    | 3.91±0.85 | 5.14±0.52 | 19.61% | 51.31% | 29.08% | 15.34±3.06 |
| FO+Fat (I) | 2.70±0.75 | 7.28±0.95 | 20.45% | 45.65% | 33.90% | 14.79±2.67 |
| CO+Fat (I) | 5.10±0.82 | 8.28±1.50 | 20.45% | 45.65% | 33.90% | 16.08±2.48 |

Table S13. HPLC analysis of Phase II screening cultivations *Rhodotorula mucilaginosa* cultivated on waste lipid media with and without lipase induction. Productions are listed in mg/g of cell dry weight.

| Sample name | Betacarotene | Torularhodin | Torulene    | Total carotenoids | Ubiquinone  | Ergosterol  |
|-------------|--------------|--------------|-------------|-------------------|-------------|-------------|
| Control     | 0.665±0.047  | 0.114±0.008  | 3.886±0.288 | 4.732±0.364       | 2.645±0.217 | 4.058±0.360 |
| FO          | 0±0          | 0±0          | 0±0         | 0.009±0.001       | 12.71±1.906 | 3.324±0.272 |
| CO          | 0.628±0.046  | 0.133±0.009  | 1.107±0.080 | 1.911±0.139       | 6.081±0.680 | 5.919±0.595 |
| Fat         | 0.385±0.028  | 0.110±0.008  | 0.593±0.044 | 1.112±0.085       | 6.437±0.741 | 5.851±0.576 |
| FO+Fat      | 0.136±0.010  | 0.097±0.007  | 0.328±0.023 | 0.571±0.041       | 7.358±0.522 | 5.227±0.572 |
| CO+Fat      | 1.157±0.089  | 0.123±0.009  | 1.105±0.082 | 2.377±0.180       | 6.299±0.754 | 5.306±0.604 |
| Control (I) | 0.561±0.039  | 0.137±0.010  | 3.346±0.278 | 4.107±0.338       | 2.330±0.201 | 3.829±0.305 |
| FO (I)      | 0.180±0.013  | 0±0          | 0.209±0.015 | 0.619±0.047       | 9.774±1.295 | 4.189±0.444 |
| CO (I)      | 0.966±0.074  | 0.120±0.009  | 1.504±0.128 | 2.645±0.250       | 9.384±0.912 | 5.296±0.573 |
| Fat (I)     | 0.875±0.061  | 0.126±0.009  | 1.293±0.104 | 2.363±0.185       | 7.279±0.947 | 5.211±0.370 |
| FO+Fat (I)  | 0.116±0.008  | 0±0          | 0.183±0.013 | 0.297±0.021       | 5.781±0.698 | 5.359±0.422 |
| CO+TFat (I) | 0.861±0.063  | 0.103±0.007  | 2.508±0.225 | 3.574±0.333       | 5.987±0.580 | 4.631±0.417 |

Table S14. Phase II: Biomass, lipid production, fatty acid profile and  $\beta$ -glucan production of *Sporidiobolus pararoseus* cultivated on on waste lipid media with and without lipase induction.

| Sample name | biomass [g/l] | % of lipids | SFA [%] | MUFA [%] | PUFA [%] | $\beta$ -glucans [%] |
|-------------|---------------|-------------|---------|----------|----------|----------------------|
| Control     | 2.01±0.84     | 5.34±0.73   | 10.08%  | 78.46%   | 11.46%   | 13.24±1.74           |
| FO          | 4.30±0.87     | 48.34±15.76 | 15.39%  | 38.09%   | 46.51%   | 15.22±2.42           |
| CO          | 6.90±0.94     | 62.63±13.25 | 70.40%  | 6.47%    | 23.13%   | 14.85±3.06           |
| Fat         | 8.61±0.78     | 39.74±6.91  | 49.82%  | 41.73%   | 8.45%    | 14.96±2.87           |
| FO+Fat      | 3.92±0.88     | 62.38±15.49 | 73.68%  | 16.26%   | 10.06%   | 15.07±1.89           |
| CO+Fat      | 9.52±1.07     | 46.71±12.22 | 45.09%  | 27.85%   | 27.06%   | 15.65±1.64           |
| Control (I) | 2.50±0.85     | 19.95±4.51  | 14.08%  | 36.87%   | 49.05%   | 13.04±2.68           |
| FO (I)      | 14.40±1.19    | 29.13±4.59  | 10.81%  | 32.03%   | 57.17%   | 15.02±3.06           |
| CO (I)      | 7.50±0.97     | 56.8±15.26  | 61.76%  | 8.53%    | 29.72%   | 15.36±3.52           |
| Fat (I)     | 5.31±0.92     | 40.09±8.12  | 42.07%  | 44.78%   | 13.14%   | 16.04±2.98           |
| FO+Fat (I)  | 12.70±1.23    | 41.14±5.78  | 27.05%  | 41.39%   | 31.56%   | 16.04±3.87           |
| CO+Fat (I)  | 6.10±0.80     | 51.5±13.29  | 73.76%  | 14.58%   | 11.66%   | 15.87±2.75           |

Table S15. HPLC analysis of Phase II screening cultivations *Sporidiobolus pararoseus* cultivated on waste lipid media with and without lipase induction. Productions are listed in mg/g of cell dry weight.

| Sample name | Betacarotene | Torularhodin | Torulene    | Total carotenoids | Ubiquinone   | Ergosterol   |
|-------------|--------------|--------------|-------------|-------------------|--------------|--------------|
| Control     | 0.464±0.033  | 2.583±0.227  | 0.203±0.015 | 3.329±0.322       | 6.394±0.448  | 10.946±1.302 |
| FO          | 0.029±0.002  | 0±0          | 0.112±0.008 | 0.168±0.012       | 11.920±1.738 | 5.241±0.609  |
| CO          | 0.045±0.003  | 0.017±0.001  | 0.113±0.008 | 0.728±0.054       | 7.627±0.760  | 2.592±0.189  |
| Fat         | 0.009±0.001  | 0±0          | 0±0         | 0.114±0.008       | 11.241±1.473 | 2.102±0.190  |
| FO+Fat      | 0.173±0.012  | 0.583±0.043  | 0.151±0.011 | 1.082±0.077       | 10.916±0.950 | 3.724±0.319  |
| CO+Fat      | 0.186±0.013  | 0±0          | 0±0         | 0.202±0.014       | 5.053±0.355  | 1.233±0.101  |
| Control (I) | 0.511±0.038  | 0.433±0.031  | 0.225±0.016 | 1.308±0.106       | 10.193±1.520 | 8.543±0.764  |
| FO (I)      | 0.347±0.025  | 0.639±0.048  | 0.273±0.019 | 1.332±0.101       | 8.388±1.272  | 3.955±0.315  |
| CO (I)      | 0.201±0.014  | 0.087±0.006  | 0.147±0.010 | 0.584±0.043       | 10.182±0.916 | 4.885±0.387  |
| Fat (I)     | 0.053±0.004  | 0.112±0.008  | 0.156±0.011 | 0.796±0.056       | 6.569±0.885  | 3.537±0.365  |
| FO+Fat (I)  | 0.157±0.011  | 0.487±0.036  | 0.201±0.014 | 1.114±0.085       | 12.168±1.237 | 3.123±0.314  |
| CO+Fat (I)  | 0.132±0.009  | 0±0          | 0.109±0.008 | 0.301±0.021       | 4.751±0.442  | 1.443±0.110  |

Table S16. Biomass, lipid production, fatty acid profile and  $\beta$ -glucan production of *Rhodotorula kratochvilovae* in a bioreactor cultivation on coffee oil and glycerol with lipase induction.

| Sample name | biomass [g/l] | % of lipids | SFA [%] | MUFA [%] | PUFA [%] | $\beta$ -glucans [%] |
|-------------|---------------|-------------|---------|----------|----------|----------------------|
| 8 H         | 1.59±0.80     | 18.03±3.14  | 34.70%  | 15.13%   | 50.17%   | 14.52±1.73           |
| 16H         | 2.86±0.87     | 14.25±2.85  | 32.40%  | 13.77%   | 53.82%   | 14.86±2.49           |
| 24 H        | 5.62±0.89     | 9.18±1.67   | 32.62%  | 13.44%   | 53.94%   | 15.03±2.34           |
| 40 H        | 7.35±1.37     | 12.95±1.84  | 38.82%  | 11.66%   | 49.52%   | 14.79±1.72           |
| 48 H        | 8.01±0.89     | 16.12±3.76  | 37.61%  | 11.89%   | 50.49%   | 15.38±2.98           |
| 56 H        | 10.18±1.21    | 25.38±6.94  | 42.49%  | 10.62%   | 46.89%   | 15.67±2.41           |
| 72 H        | 12.23±0.79    | 19.56±5.49  | 29.82%  | 16.25%   | 53.92%   | 15.41±2.65           |
| 96 H        | 17.24±2.39    | 20.76±6.21  | 35.20%  | 12.71%   | 52.10%   | 16.03±3.04           |
| 120 H       | 17.84±0.99    | 17.22±2.49  | 35.36%  | 14.61%   | 50.03%   | 15.98±2.81           |
| 144 H       | 18.64±2.08    | 15.89±4.07  | 33.29%  | 16.26%   | 50.45%   | 16.57±2.05           |
| 168 H       | 18.82±2.27    | 15.55±2.35  | 33.05%  | 18.33%   | 48.63%   | 17.25±1.57           |

Table S17. Biomass, lipid production, fatty acid profile and  $\beta$ -glucan production of *Rhodotorula toruloides* in a bioreactor cultivation on coffee oil and glycerol with lipase induction.

| Sample name | biomass [g/l] | % of lipids | SFA [%] | MUFA [%] | PUFA [%] | $\beta$ -glucans [%] |
|-------------|---------------|-------------|---------|----------|----------|----------------------|
| 4 H         | 0.98±0.78     | 23.05±6.85  | 20.42%  | 35.14%   | 44.44%   | 13.24±2.08           |
| 14H         | 2.05±0.78     | 13.25±2.53  | 18.15%  | 34.25%   | 47.60%   | 13.64±2.34           |
| 24 H        | 5.09±1.04     | 8.46±1.35   | 15.15%  | 32.21%   | 52.64%   | 13.48±2.67           |
| 36 H        | 6.81±1.36     | 13.15±2.40  | 16.25%  | 31.48%   | 52.27%   | 14.02±2.14           |
| 48 H        | 8.32±0.82     | 15.26±2.80  | 15.47%  | 29.15%   | 55.38%   | 14.32±3.11           |
| 60 H        | 9.54±1.38     | 16.25±4.11  | 18.48%  | 24.32%   | 57.20%   | 14.05±2.99           |
| 72 H        | 11.85±1.12    | 21.23±4.64  | 14.84%  | 26.87%   | 58.29%   | 15.03±1.58           |
| 96 H        | 14.52±0.95    | 28.46±5.01  | 13.26%  | 28.42%   | 58.32%   | 15.34±2.24           |
| 120 H       | 15.98±1.09    | 21.25±3.73  | 15.08%  | 24.15%   | 60.77%   | 15.87±3.08           |
| 146 H       | 17.82±2.36    | 19.26±4.79  | 11.78%  | 26.24%   | 61.98%   | 16.03±1.42           |

|       |            |            |        |        |        |            |
|-------|------------|------------|--------|--------|--------|------------|
| 168 H | 18.82±2.44 | 23.12±5.43 | 10.47% | 25.34% | 64.19% | 15.24±1.29 |
|-------|------------|------------|--------|--------|--------|------------|

Chromatogram S1 GC-FID analysis chromatogram of *Rhodotorula toruloides* cultivated on media with waste frying oil as a carbon source in Erlenmeyer flask.

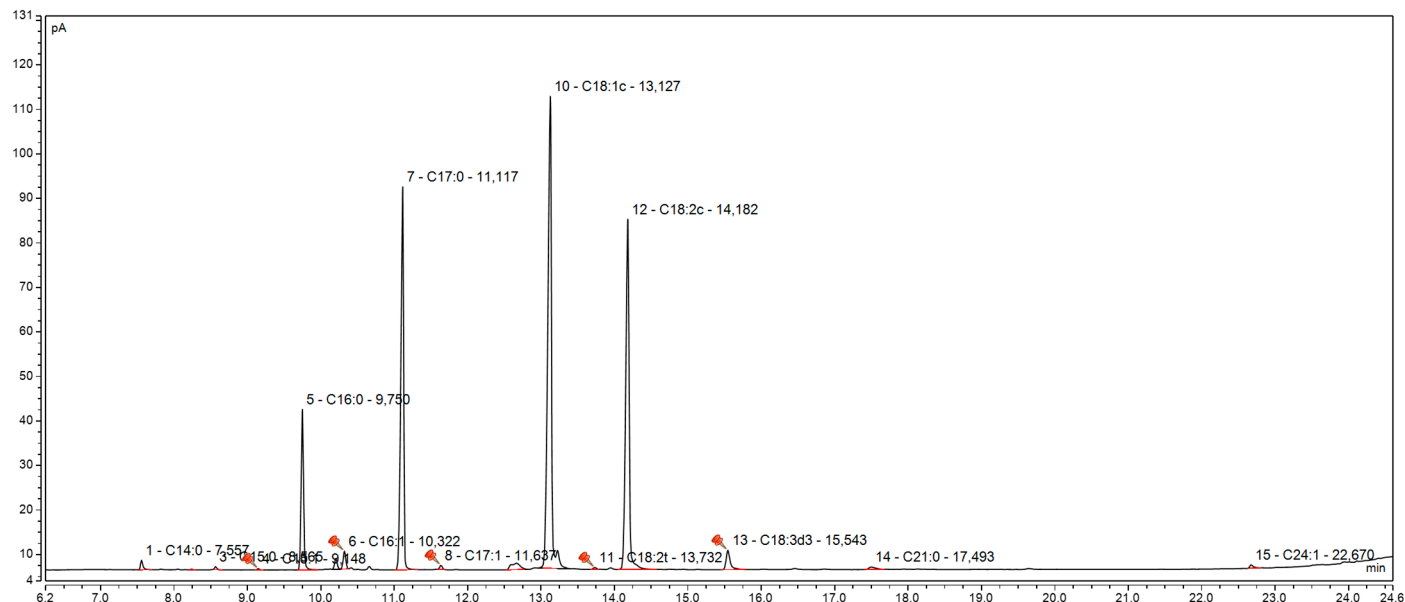

Chromatogram S2 GC-FID analysis chromatogram of *Rhodotorula kratochvilovae* cultivated on media with waste coffee oil as a carbon source in Erlenmeyer flask.

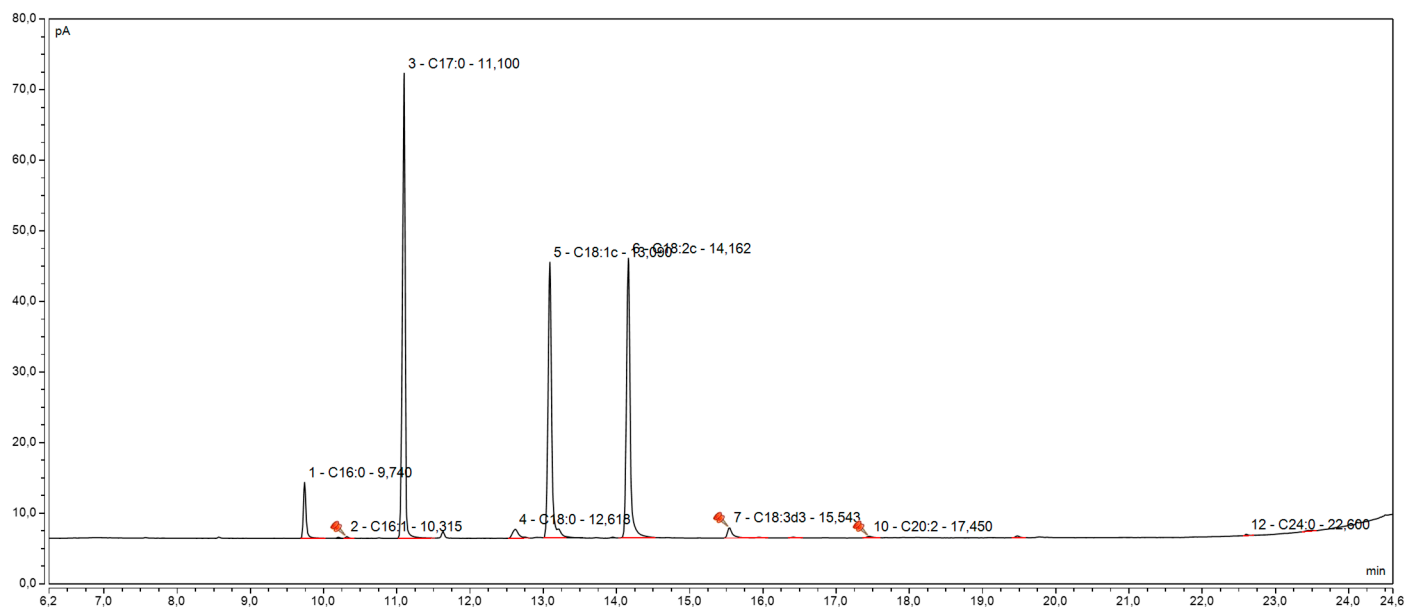

Chromatogram S3 HPLC-DAD analysis chromatogram of *Rhodotorula toruloides* cultivated on control media in Erlenmeyer flask. First channel is a 285 nm. Second one is 435 nm.

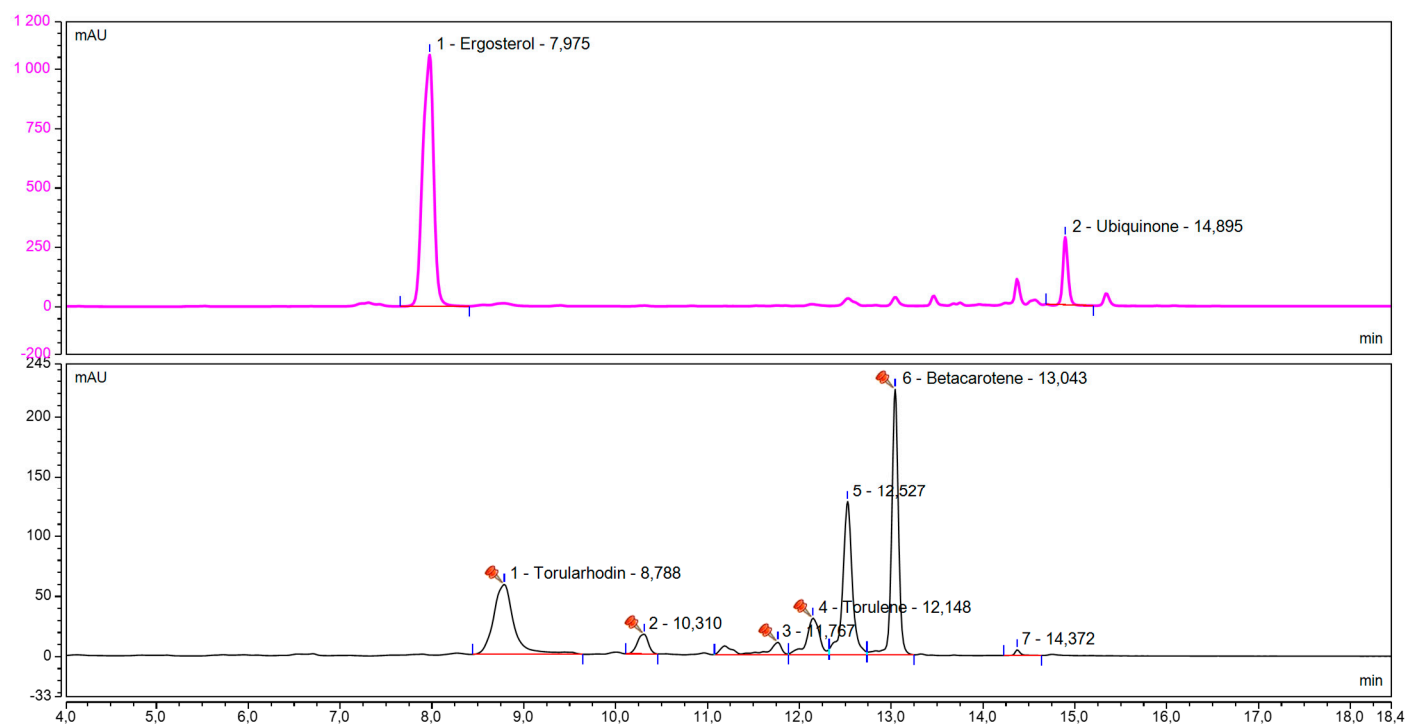

Chromatogram S4 HPLC-DAD analysis chromatogram of *Rhodotorula kratochvilovae* bioreactor cultivation at 144<sup>th</sup> hour. First channel is a 285 nm. Second one is 435 nm.

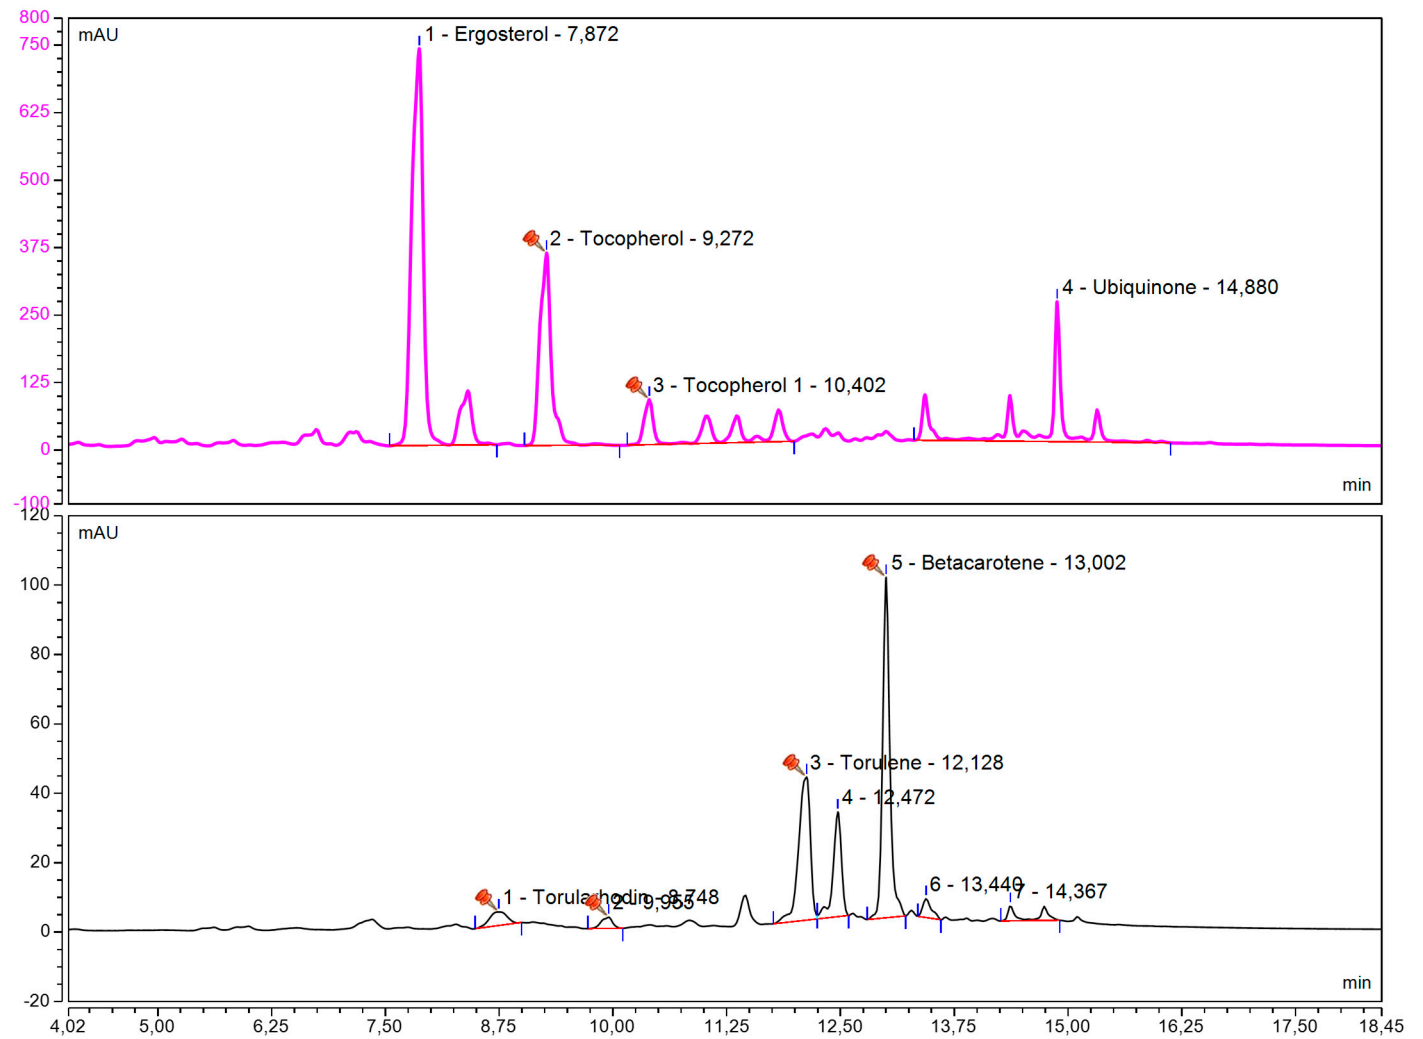

Supplement: s1 [file s1]
